# Supplementary material for: VRN1 genes variability in tetraploid wheat species with a spring growth habit
Source: PubMed Central journal article supplement (PMC5123248; doi:10.1186/s12870-016-0924-z), 2016-11-16
Supplement: 12870_2016_924_MOESM1_ESM.pdf [file 12870_2016_924_MOESM1_ESM.pdf]

## Additional file 1

**Journal:** BMC Plant Biology.

**Title:** *VRNI* genes variability in tetraploid wheat species with a spring growth habit.

**Authors:** Irina Konopatskaia\*, Valeriya Vavilova, Elena Ya. Kondratenko, Alexandr Blinov and Nikolay P. Goncharov.

\* - corresponding author: The Federal Research Center Institute of Cytology and Genetics SB RAS, Prospekt Lavrentyeva, 10, Novosibirsk, Russian Federation, 630090; Novosibirsk State University, Pirogova 2, 630090, Novosibirsk, Russian Federation; phone: +7 (383) 363-4969; [sormacheva@bionet.nsc.ru](mailto:sormacheva@bionet.nsc.ru)

**Table S1.** List of tetraploid wheat species used in the study and their growth habit. Species names are given according to Dorofeev et al. [1] and Goncharov [2].

| №                                         | Species and cultivar                                           | Accession/ specimen voucher | Sample location | Growth habit |
|-------------------------------------------|----------------------------------------------------------------|-----------------------------|-----------------|--------------|
| <b>Section <i>Dicoccoides</i> Flaksb.</b> |                                                                |                             |                 |              |
| 1.                                        | <i>Triticum aethiopicum</i> Jakubz.                            | K-18999                     | Ethiopia        | s            |
| 2.                                        | <i>T. aethiopicum</i> Jakubz.                                  | K-19301                     | Ethiopia        | s            |
| 3.                                        | <i>T. aethiopicum</i> Jakubz.                                  | K-19398                     | Ethiopia        | s            |
| 4.                                        | <i>T. aethiopicum</i> Jakubz.                                  | K-19553                     | Ethiopia        | s            |
| 5.                                        | <i>T. aethiopicum</i> Jakubz. cv. Gukur-sindi                  | K-19253                     | Ethiopia        | s            |
| 6.                                        | <i>T. aethiopicum</i> Jakubz.                                  | K-19650                     | Eritrea         | s            |
| 7.                                        | <i>T. aethiopicum</i> Jakubz.                                  | K-19059                     | Ethiopia        | s            |
| 8.                                        | <i>T. aethiopicum</i> Jakubz.                                  | K-43766                     | Ethiopia        | s            |
| 9.                                        | <i>T. aethiopicum</i> Jakubz.                                  | St56                        | Ethiopia        | s            |
| 10.                                       | <i>T. carthlicum</i> Nevski                                    | K-7106                      | Georgia         | s            |
| 11.                                       | <i>T. dicoccoides</i> (Körn. ex Aschers. et Graebn.) Schweinf. | PI 352324                   | Lebanon         | s            |
| 12.                                       | <i>T. dicoccoides</i> (Körn. ex Aschers. et Graebn.) Schweinf. | PI 352328                   | Germany         | s            |
| 13.                                       | <i>T. dicoccoides</i> (Körn. ex Aschers. et Graebn.) Schweinf. | PI 428105                   | Israel          | s            |
| 14.                                       | <i>T. dicoccoides</i> (Körn. ex Aschers. et Graebn.) Schweinf. | IG 46225                    | Turkey          | s            |
| 15.                                       | <i>T. dicoccoides</i> (Körn. ex Aschers. et Graebn.) Schweinf. | IG 46223                    | Turkey          | s            |
| 16.                                       | <i>T. dicoccoides</i> (Körn. ex Aschers. et Graebn.) Schweinf. | ICG expedition № 1          | Turkey          | w            |
| 17.                                       | <i>T. dicoccoides</i> (Körn. ex Aschers. et Graebn.) Schweinf. | ICG expedition № 2          | Turkey          | w            |
| 18.                                       | <i>T. dicoccoides</i> (Körn. ex Aschers. et Graebn.) Schweinf. | ICG expedition № 3          | Turkey          | w            |
| 19.                                       | <i>T. dicoccoides</i> (Körn. ex Aschers. et Graebn.) Schweinf. | ICG expedition № 4          | Turkey          | w            |
| 20.                                       | <i>T. dicoccoides</i> (Körn. ex Aschers. et Graebn.) Schweinf. | ICG expedition № 5          | Turkey          | w            |
| 21.                                       | <i>T. dicoccoides</i> (Körn. ex Aschers. et Graebn.) Schweinf. | ICG expedition № 6          | Turkey          | w            |
| 22.                                       | <i>T. dicoccoides</i> (Körn. ex Aschers. et Graebn.) Schweinf. | ICG expedition № 7          | Turkey          | w            |
| 23.                                       | <i>T. dicoccoides</i> (Körn. ex Aschers. et Graebn.) Schweinf. | ICG expedition № 8          | Turkey          | w            |
| 24.                                       | <i>T. dicoccoides</i> (Körn. ex Aschers. et Graebn.) Schweinf. | ICG expedition № 9          | Turkey          | w            |
| 25.                                       | <i>T. dicoccoides</i> (Körn. ex Aschers. et Graebn.) Schweinf. | ICG expedition № 10         | Turkey          | w            |
| 26.                                       | <i>T. dicoccoides</i> (Körn. ex Aschers. et Graebn.) Schweinf. | ICG expedition № 11         | Turkey          | w            |
| 27.                                       | <i>T. dicoccoides</i> (Körn. ex Aschers. et Graebn.) Schweinf. | ICG expedition № 12         | Turkey          | w            |
| 28.                                       | <i>T. dicoccoides</i> (Körn. ex Aschers. et Graebn.) Schweinf. | ICG expedition № 13         | Turkey          | w            |
| 29.                                       | <i>T. dicoccoides</i> (Körn. ex Aschers. et Graebn.) Schweinf. | ICG expedition № 14         | Turkey          | w            |



**Table S1, continued.**

| №                                         | Species and cultivar                                           | Accession/ specimen voucher | Sample location | Growth habit |
|-------------------------------------------|----------------------------------------------------------------|-----------------------------|-----------------|--------------|
| <b>Section <i>Dicoccoides</i> Flaksb.</b> |                                                                |                             |                 |              |
| 80.                                       | <i>T. dicoccoides</i> (Körn. ex Aschers. et Graebn.) Schweinf. | ICG expedition № 123        | Turkey          | w            |
| 81.                                       | <i>T. dicoccoides</i> (Körn. ex Aschers. et Graebn.) Schweinf. | ICG expedition № 124        | Turkey          | w            |
| 82.                                       | <i>T. dicoccoides</i> (Körn. ex Aschers. et Graebn.) Schweinf. | ICG expedition № 125        | Turkey          | w            |
| 83.                                       | <i>T. dicoccoides</i> (Körn. ex Aschers. et Graebn.) Schweinf. | ICG expedition № 127        | Turkey          | w            |
| 84.                                       | <i>T. dicoccoides</i> (Körn. ex Aschers. et Graebn.) Schweinf. | ICG expedition № 129        | Turkey          | w            |
| 85.                                       | <i>T. dicoccoides</i> (Körn. ex Aschers. et Graebn.) Schweinf. | ICG expedition № 161        | Turkey          | w            |
| 86.                                       | <i>T. dicoccoides</i> (Körn. ex Aschers. et Graebn.) Schweinf. | ICG expedition № 176        | Turkey          | w            |
| 87.                                       | <i>T. dicoccoides</i> (Körn. ex Aschers. et Graebn.) Schweinf. | ICG expedition № 185        | Turkey          | w            |
| 88.                                       | <i>T. dicoccoides</i> (Körn. ex Aschers. et Graebn.) Schweinf. | ICG expedition № 187        | Turkey          | w            |
| 89.                                       | <i>T. dicoccoides</i> (Körn. ex Aschers. et Graebn.) Schweinf. | ICG expedition № 188        | Turkey          | w            |
| 90.                                       | <i>T. dicoccoides</i> (Körn. ex Aschers. et Graebn.) Schweinf. | ICG expedition № 192        | Turkey          | w            |
| 91.                                       | <i>T. dicoccoides</i> (Körn. ex Aschers. et Graebn.) Schweinf. | ICG expedition № k-2        | Turkey          | w            |
| 92.                                       | <i>T. dicoccoides</i> (Körn. ex Aschers. et Graebn.) Schweinf. | ICG expedition № 661        | Turkey          | w            |
| 93.                                       | <i>T. dicoccoides</i> (Körn. ex Aschers. et Graebn.) Schweinf. | ICG expedition № 1-4        | Turkey          | w            |
| 94.                                       | <i>T. dicoccoides</i> (Körn. ex Aschers. et Graebn.) Schweinf. | ICG expedition № 6-4-08     | Turkey          | w            |
| 95.                                       | <i>T. dicoccoides</i> (Körn. ex Aschers. et Graebn.) Schweinf. | ICG expedition № 233        | Turkey          | w            |
| 96.                                       | <i>T. dicoccoides</i> (Körn. ex Aschers. et Graebn.) Schweinf. | ICG expedition № 244        | Turkey          | w            |
| 97.                                       | <i>T. dicoccoides</i> (Körn. ex Aschers. et Graebn.) Schweinf. | ICG expedition № 410        | Turkey          | w            |
| 98.                                       | <i>T. dicoccoides</i> (Körn. ex Aschers. et Graebn.) Schweinf. | ICG expedition № 414        | Turkey          | w            |
| 99.                                       | <i>T. dicoccoides</i> (Körn. ex Aschers. et Graebn.) Schweinf. | ICG expedition № 422        | Turkey          | w            |
| 100.                                      | <i>T. dicoccoides</i> (Körn. ex Aschers. et Graebn.) Schweinf. | ICG expedition № 515        | Turkey          | w            |
| 101.                                      | <i>T. dicoccoides</i> (Körn. ex Aschers. et Graebn.) Schweinf. | ICG expedition № 520        | Turkey          | w            |
| 102.                                      | <i>T. dicoccoides</i> (Körn. ex Aschers. et Graebn.) Schweinf. | ICG expedition № 522        | Turkey          | w            |
| 103.                                      | <i>T. dicoccoides</i> (Körn. ex Aschers. et Graebn.) Schweinf. | ICG expedition № 525        | Turkey          | w            |
| 104.                                      | <i>T. dicoccoides</i> (Körn. ex Aschers. et Graebn.) Schweinf. | ICG expedition № 527        | Turkey          | w            |
| 105.                                      | <i>T. dicoccoides</i> (Körn. ex Aschers. et Graebn.) Schweinf. | ICG expedition № 537        | Turkey          | w            |
| 106.                                      | <i>T. dicoccoides</i> (Körn. ex Aschers. et Graebn.) Schweinf. | ICG expedition № 13-1-88    | Turkey          | w            |
| 107.                                      | <i>T. dicoccoides</i> (Körn. ex Aschers. et Graebn.) Schweinf. | IG 46148                    | Turkey          | w            |
| 108.                                      | <i>T. dicoccoides</i> (Körn. ex Aschers. et Graebn.) Schweinf. | IG 116181                   | Turkey          | w            |
| 109.                                      | <i>T. dicoccoides</i> (Körn. ex Aschers. et Graebn.) Schweinf. | IG 46191                    | Turkey          | w            |
| 110.                                      | <i>T. dicoccoides</i> (Körn. ex Aschers. et Graebn.) Schweinf. | IG 46149                    | Turkey          | w            |
| 111.                                      | <i>T. dicoccoides</i> (Körn. ex Aschers. et Graebn.) Schweinf. | IG 46165                    | Turkey          | w            |
| 112.                                      | <i>T. dicoccoides</i> (Körn. ex Aschers. et Graebn.) Schweinf. | IG 46167                    | Turkey          | w            |
| 113.                                      | <i>T. dicoccoides</i> (Körn. ex Aschers. et Graebn.) Schweinf. | IG 46171                    | Turkey          | w            |
| 114.                                      | <i>T. dicoccoides</i> (Körn. ex Aschers. et Graebn.) Schweinf. | IG 46173                    | Turkey          | w            |
| 115.                                      | <i>T. dicoccoides</i> (Körn. ex Aschers. et Graebn.) Schweinf. | IG 46191                    | Turkey          | w            |
| 116.                                      | <i>T. dicoccoides</i> (Körn. ex Aschers. et Graebn.) Schweinf. | IG 46175                    | Turkey          | w            |
| 117.                                      | <i>T. dicoccoides</i> (Körn. ex Aschers. et Graebn.) Schweinf. | IG 46177                    | Turkey          | w            |
| 118.                                      | <i>T. dicoccoides</i> (Körn. ex Aschers. et Graebn.) Schweinf. | IG 46180                    | Turkey          | w            |
| 119.                                      | <i>T. dicoccoides</i> (Körn. ex Aschers. et Graebn.) Schweinf. | IG 46181                    | Turkey          | w            |
| 120.                                      | <i>T. dicoccoides</i> (Körn. ex Aschers. et Graebn.) Schweinf. | IG 46182                    | Turkey          | w            |
| 121.                                      | <i>T. dicoccoides</i> (Körn. ex Aschers. et Graebn.) Schweinf. | IG 46183                    | Turkey          | w            |
| 122.                                      | <i>T. dicoccoides</i> (Körn. ex Aschers. et Graebn.) Schweinf. | IG 46206                    | Turkey          | w            |
| 123.                                      | <i>T. dicoccoides</i> (Körn. ex Aschers. et Graebn.) Schweinf. | IG 46207                    | Turkey          | w            |
| 124.                                      | <i>T. dicoccoides</i> (Körn. ex Aschers. et Graebn.) Schweinf. | IG 46210                    | Turkey          | w            |
| 125.                                      | <i>T. dicoccoides</i> (Körn. ex Aschers. et Graebn.) Schweinf. | IG 46212                    | Turkey          | w            |
| 126.                                      | <i>T. dicoccoides</i> (Körn. ex Aschers. et Graebn.) Schweinf. | IG 46216                    | Turkey          | w            |
| 127.                                      | <i>T. dicoccoides</i> (Körn. ex Aschers. et Graebn.) Schweinf. | IG 46218                    | Turkey          | w            |
| 128.                                      | <i>T. dicoccoides</i> (Körn. ex Aschers. et Graebn.) Schweinf. | IG 46219                    | Turkey          | w            |
| 129.                                      | <i>T. dicoccoides</i> (Körn. ex Aschers. et Graebn.) Schweinf. | IG 46226                    | Turkey          | w            |
| 130.                                      | <i>T. dicoccoides</i> (Körn. ex Aschers. et Graebn.) Schweinf. | IG 46233                    | Turkey          | w            |

Table S1, continued.

| №                                         | Species and cultivar                                           | Accession/ specimen voucher | Sample location | Growth habit |
|-------------------------------------------|----------------------------------------------------------------|-----------------------------|-----------------|--------------|
| <b>Section <i>Dicoccoides</i> Flaksb.</b> |                                                                |                             |                 |              |
| 131.                                      | <i>T. dicoccoides</i> (Körn. ex Aschers. et Graebn.) Schweinf. | IG46236                     | Turkey          | w            |
| 132.                                      | <i>T. dicoccoides</i> (Körn. ex Aschers. et Graebn.) Schweinf. | IG46239                     | Turkey          | w            |
| 133.                                      | <i>T. dicoccoides</i> (Körn. ex Aschers. et Graebn.) Schweinf. | IG 46250                    | Turkey          | w            |
| 134.                                      | <i>T. dicoccoides</i> (Körn. ex Aschers. et Graebn.) Schweinf. | IG 46244                    | Turkey          | w            |
| 135.                                      | <i>T. dicoccoides</i> (Körn. ex Aschers. et Graebn.) Schweinf. | IG 46252                    | Turkey          | w            |
| 136.                                      | <i>T. dicoccoides</i> (Körn. ex Aschers. et Graebn.) Schweinf. | IG 46253                    | Turkey          | w            |
| 137.                                      | <i>T. dicoccoides</i> (Körn. ex Aschers. et Graebn.) Schweinf. | IG 116171                   | Turkey          | w            |
| 138.                                      | <i>T. dicoccoides</i> (Körn. ex Aschers. et Graebn.) Schweinf. | IG 116172                   | Turkey          | w            |
| 139.                                      | <i>T. dicoccoides</i> (Körn. ex Aschers. et Graebn.) Schweinf. | IG 116173                   | Turkey          | w            |
| 140.                                      | <i>T. dicoccoides</i> (Körn. ex Aschers. et Graebn.) Schweinf. | IG 116174                   | Turkey          | w            |
| 141.                                      | <i>T. dicoccoides</i> (Körn. ex Aschers. et Graebn.) Schweinf. | IG 116175                   | Turkey          | w            |
| 142.                                      | <i>T. dicoccoides</i> (Körn. ex Aschers. et Graebn.) Schweinf. | IG 116180                   | Turkey          | w            |
| 143.                                      | <i>T. dicoccoides</i> (Körn. ex Aschers. et Graebn.) Schweinf. | IG 116183                   | Turkey          | w            |
| 144.                                      | <i>T. dicoccoides</i> (Körn. ex Aschers. et Graebn.) Schweinf. | IG 116184                   | Turkey          | w            |
| 145.                                      | <i>T. dicoccoides</i> (Körn. ex Aschers. et Graebn.) Schweinf. | IG 116185                   | Turkey          | w            |
| 146.                                      | <i>T. dicoccoides</i> (Körn. ex Aschers. et Graebn.) Schweinf. | IG 116188                   | Turkey          | w            |
| 147.                                      | <i>T. dicoccoides</i> (Körn. ex Aschers. et Graebn.) Schweinf. | IG 116178                   | Turkey          | w            |
| 148.                                      | <i>T. dicoccoides</i> (Körn. ex Aschers. et Graebn.) Schweinf. | IG 116179                   | Turkey          | w            |
| 149.                                      | <i>T. dicoccoides</i> (Körn. ex Aschers. et Graebn.) Schweinf. | IG 45964                    | Jordan          | w            |
| 150.                                      | <i>T. dicoccoides</i> (Körn. ex Aschers. et Graebn.) Schweinf. | IG 46486                    | Jordan          | w            |
| 151.                                      | <i>T. dicoccoides</i> (Körn. ex Aschers. et Graebn.) Schweinf. | IG 46357                    | Jordan          | w            |
| 152.                                      | <i>T. dicoccoides</i> (Körn. ex Aschers. et Graebn.) Schweinf. | IG 46493                    | Jordan          | w            |
| 153.                                      | <i>T. dicoccoides</i> (Körn. ex Aschers. et Graebn.) Schweinf. | IG 115811                   | Jordan          | w            |
| 154.                                      | <i>T. dicoccoides</i> (Körn. ex Aschers. et Graebn.) Schweinf. | PI 470736                   | Turkey          | w            |
| 155.                                      | <i>T. dicoccoides</i> (Körn. ex Aschers. et Graebn.) Schweinf. | IG 46183                    | Turkey          | w            |
| 156.                                      | <i>T. dicoccoides</i> (Körn. ex Aschers. et Graebn.) Schweinf. | PI 554584                   | Turkey          | w            |
| 157.                                      | <i>T. dicoccoides</i> (Körn. ex Aschers. et Graebn.) Schweinf. | PI 560873                   | Turkey          | w            |
| 158.                                      | <i>T. dicoccoides</i> (Körn. ex Aschers. et Graebn.) Schweinf. | PI 560877                   | Turkey          | w            |
| 159.                                      | <i>T. dicoccoides</i> (Körn. ex Aschers. et Graebn.) Schweinf. | PI 654334                   | Turkey          | w            |
| 160.                                      | <i>T. dicoccoides</i> (Körn. ex Aschers. et Graebn.) Schweinf. | PI 654336                   | Turkey          | w            |
| 161.                                      | <i>T. dicoccoides</i> (Körn. ex Aschers. et Graebn.) Schweinf. | PI 656865                   | Turkey          | w            |
| 162.                                      | <i>T. dicoccoides</i> (Körn. ex Aschers. et Graebn.) Schweinf. | PI 656868                   | Turkey          | w            |
| 163.                                      | <i>T. dicoccoides</i> (Körn. ex Aschers. et Graebn.) Schweinf. | PI 656870                   | Turkey          | w            |
| 164.                                      | <i>T. dicoccoides</i> (Körn. ex Aschers. et Graebn.) Schweinf. | PI 656873                   | Turkey          | w            |
| 165.                                      | <i>T. dicoccoides</i> (Körn. ex Aschers. et Graebn.) Schweinf. | ICG expedition № 1          | Israel          | w            |
| 166.                                      | <i>T. dicoccoides</i> (Körn. ex Aschers. et Graebn.) Schweinf. | ICG expedition № 2          | Israel          | w            |
| 167.                                      | <i>T. dicoccoides</i> (Körn. ex Aschers. et Graebn.) Schweinf. | ICG expedition № 3          | Israel          | w            |
| 168.                                      | <i>T. dicoccoides</i> (Körn. ex Aschers. et Graebn.) Schweinf. | ICG expedition № 4          | Israel          | w            |
| 169.                                      | <i>T. dicoccoides</i> (Körn. ex Aschers. et Graebn.) Schweinf. | ICG expedition № 5          | Israel          | w            |
| 170.                                      | <i>T. dicoccoides</i> (Körn. ex Aschers. et Graebn.) Schweinf. | ICG expedition № 6          | Israel          | w            |
| 171.                                      | <i>T. dicoccoides</i> (Körn. ex Aschers. et Graebn.) Schweinf. | ICG expedition № 7          | Israel          | w            |
| 172.                                      | <i>T. dicoccoides</i> (Körn. ex Aschers. et Graebn.) Schweinf. | ICG expedition № 8          | Israel          | w            |
| 173.                                      | <i>T. dicoccoides</i> (Körn. ex Aschers. et Graebn.) Schweinf. | ICG expedition № 9          | Israel          | w            |
| 174.                                      | <i>T. dicoccoides</i> (Körn. ex Aschers. et Graebn.) Schweinf. | ICG expedition № 10         | Israel          | w            |
| 175.                                      | <i>T. dicoccoides</i> (Körn. ex Aschers. et Graebn.) Schweinf. | ICG expedition № 11         | Israel          | w            |
| 176.                                      | <i>T. dicoccoides</i> (Körn. ex Aschers. et Graebn.) Schweinf. | ICG expedition № 12         | Israel          | w            |
| 177.                                      | <i>T. dicoccoides</i> (Körn. ex Aschers. et Graebn.) Schweinf. | ICG expedition № 13         | Israel          | w            |
| 178.                                      | <i>T. dicoccoides</i> (Körn. ex Aschers. et Graebn.) Schweinf. | ICG expedition № 14         | Israel          | w            |
| 179.                                      | <i>T. dicoccoides</i> (Körn. ex Aschers. et Graebn.) Schweinf. | ICG expedition № 15         | Israel          | w            |
| 180.                                      | <i>T. dicoccoides</i> (Körn. ex Aschers. et Graebn.) Schweinf. | PI 467027                   | Israel          | s            |
| 181.                                      | <i>T. dicoccoides</i> (Körn. ex Aschers. et Graebn.) Schweinf. | PI 467014                   | Israel          | s            |

**Table S1, continued.**

| №                                                    | Species and cultivar                                           | Accession/ specimen voucher | Sample location | Growth habit |
|------------------------------------------------------|----------------------------------------------------------------|-----------------------------|-----------------|--------------|
| <b>Section <i>Dicoccoides</i> Flaksb.</b>            |                                                                |                             |                 |              |
| 182                                                  | <i>T. dicoccoides</i> (Körn. ex Aschers. et Graebn.) Schweinf. | PI 467019                   | Israel          | s            |
| 183                                                  | <i>T. dicoccoides</i> (Körn. ex Aschers. et Graebn.) Schweinf. | K-62328                     | Israel          | s            |
| 184                                                  | <i>T. dicoccoides</i> (Körn. ex Aschers. et Graebn.) Schweinf. | K-26118                     | Israel          | s            |
| 185                                                  | <i>T. dicoccoides</i> (Körn. ex Aschers. et Graebn.) Schweinf. | ICG №13                     | Israel          | s            |
| 186                                                  | <i>T. dicoccoides</i> (Körn. ex Aschers. et Graebn.) Schweinf. | ICG №15                     | Israel          | s            |
| 187                                                  | <i>T. dicoccoides</i> (Körn. ex Aschers. et Graebn.) Schweinf. | ICG №18                     | Israel          | s            |
| 188                                                  | <i>T. dicoccoides</i> (Körn. ex Aschers. et Graebn.) Schweinf. | ICG №19                     | Israel          | s            |
| 189                                                  | <i>T. dicoccoides</i> (Körn. ex Aschers. et Graebn.) Schweinf. | ICG №2                      | Israel          | s            |
| 190                                                  | <i>T. dicoccoides</i> (Körn. ex Aschers. et Graebn.) Schweinf. | ICG №23                     | Israel          | s            |
| 191                                                  | <i>T. dicoccoides</i> (Körn. ex Aschers. et Graebn.) Schweinf. | ICG №24                     | Israel          | s            |
| 192                                                  | <i>T. dicoccoides</i> (Körn. ex Aschers. et Graebn.) Schweinf. | ICG №27                     | Israel          | s            |
| 193                                                  | <i>T. dicoccoides</i> (Körn. ex Aschers. et Graebn.) Schweinf. | ICG №125                    | Israel          | s            |
| 194                                                  | <i>T. dicoccoides</i> (Körn. ex Aschers. et Graebn.) Schweinf. | K-15900                     | Israel          | s            |
| 195                                                  | <i>T. dicoccoides</i> (Körn. ex Aschers. et Graebn.) Schweinf. | IG 346783                   | Azerbaijan      | s            |
| 196                                                  | <i>T. dicoccum</i> (Schrank) Schuebl. cv. Krausei              | K-20749                     | Germany         | s            |
| 197                                                  | <i>T. dicoccum</i> (Schrank) Schuebl. cv. Dichter Rotlicher    | K-1730                      | Germany         | s            |
| 198                                                  | <i>T. dicoccum</i> (Schrank) Schuebl.                          | K-7500                      | Germany         | s            |
| 199                                                  | <i>T. dicoccum</i> cv. Bastard Emmer verastelter               | K-40306                     | Germany         | s            |
| 200                                                  | <i>T. dicoccum</i> (Schrank) Schuebl i: BS1E                   | -                           | Russia          | s            |
| 201                                                  | <i>T. durum</i> Desf. cv. Langdon                              | -                           | USA             | s            |
| 202                                                  | <i>T. durum</i> Desf.                                          | K-17784                     | Cyprus          | s            |
| 203                                                  | <i>T. durum</i> Desf.                                          | K-17787                     | Cyprus          | s            |
| 204                                                  | <i>T. durum</i> Desf. cv. Gaza                                 | K-52989                     | Israel          | s            |
| 205                                                  | <i>T. durum</i> Desf.                                          | K-13768                     | Armenia         | s            |
| 206                                                  | <i>T. durum</i> Desf. cv. Nursit                               | K-18118                     | Israel          | s            |
| 207                                                  | <i>T. durum</i> Desf.                                          | IG 85879                    | Jordania        | s            |
| 208                                                  | <i>T. ispahanicum</i> Heslot                                   | KU 145                      | Iran            | w            |
| 209                                                  | <i>T. ispahanicum</i> Heslot                                   | K-51762                     | Iran            | w            |
| 210                                                  | <i>T. ispahanicum</i> Heslot                                   | K-43064                     | Iran            | w            |
| 211                                                  | <i>T. karamyshevii</i> Nevski                                  | K-28162                     | Georgia         | w            |
| 212                                                  | <i>T. karamyshevii</i> Nevski                                  | K-28205                     | Georgia         | w            |
| 213                                                  | <i>T. karamyshevii</i> Nevski                                  | K-38549                     | Georgia         | w            |
| 214                                                  | <i>T. karamyshevii</i> Nevski                                  | KU 190-2                    | Georgia         | w            |
| 215                                                  | <i>T. polonicum</i> L.                                         | K-17893                     | Israel          | s            |
| 216                                                  | <i>T. polonicum</i> L.                                         | K-19597                     | Ethiopia        | s            |
| 217                                                  | <i>T. polonicum</i> L.                                         | K-43335                     | China           | s            |
| 218                                                  | <i>T. turanicum</i>                                            | K-31693                     | Tajikistan      | s            |
| 219                                                  | <i>T. turgidum</i> L.                                          | K-3047                      | Uzbekistan      | s            |
| 220                                                  | <i>T. turgidum</i> L.                                          | K-13489                     | Azerbaijan      | s            |
| 221                                                  | <i>T. turgidum</i> L. cv. Zafrani                              | K-11597                     | Afghanistan     | s            |
| 222                                                  | <i>T. turgidum</i> L. cv. Maiorka                              | K-16156                     | Algeria         | s            |
| 223                                                  | <i>T. turgidum</i> L. cv. Blancal                              | K-20416                     | Spain           | s            |
| <b>Section <i>Timopheevii</i> A.Filet. et Dorof.</b> |                                                                |                             |                 |              |
| 224                                                  | <i>T. araraticum</i> Jakubz.                                   | K-58667                     | Armenia         | s            |
| 225                                                  | <i>T. araraticum</i> Jakubz.                                   | K-30234                     | Azerbaijan      | s            |
| 226                                                  | <i>T. timopheevii</i> (Zhuk.) Zhuk. Zanduri population         | K-38555                     | Georgia         | s            |
| 227                                                  | <i>T. timopheevii</i> (Zhuk.) Zhuk.                            | K-29540                     | Georgia         | s            |
| 228                                                  | <i>T. timopheevii</i> (Zhuk.) Zhuk.                            | KU107-1                     | Georgia         | s            |

**Table S2.** Set of primers used in the present study.

| Primers name | Primers sequence               | Target sequence                 | Reference |
|--------------|--------------------------------|---------------------------------|-----------|
| VRN1AF       | 5'-GAAAGGAAAAATTCTGCTCG-3'     | <i>VRN-A1</i> promoter          | [3]       |
| VRN1-INT1R   | 5'-GCAGGAAATCGAAATCGAAG-3'     |                                 |           |
| Intr1/C/F    | 5'-GCACTCCTAACCCACTAACC-3'     | <i>VRN-A1</i> intron 1          | [4]       |
| Intr1/AB/R   | 5'-TCATCCATCATCAAGGCAAA-3'     |                                 |           |
| Ex1/C/F      | 5'-GTTCTCCACCGAGTCATGGT-3'     | <i>VRN-A1</i> intron 1 with     | [4]       |
| Intr1/A/R3   | 5'-AAGTAAGACAACACGAATGTGAGA-3' | Langdon deletion                |           |
| Intr1/A/F2   | 5'-AGCCTCCACGGTTTGAAAGTAA-3'   | <i>VRN-A1</i> intron 1 with     | [4]       |
| Intr1/A/R3   | 5'-AAGTAAGACAACACGAATGTGAGA-3' | IL369 deletion                  |           |
| VRN1BF       | 5'-CAGTACCCCTGCTACCAGTG-3'     | <i>VRN-B1</i> promoter,         | [3]       |
| VRN1-INT1R   | 5'-GCAGGAAATCGAAATCGAAG-3'     | <i>VRN-G1</i> promoter          |           |
| Intr1/B/F    | 5'-CAAGTGGAACGGTTAGGACA-3'     | <i>VRN-B1</i> and <i>VRN-G1</i> | [4]       |
| Intr1/B/R4   | 5'-CAAATGAAAAGGAATGAGAGCA-3'   | intron 1                        |           |
| Intr1/B/F    | 5'-CAAGTGGAACGGTTAGGACA-3'     | <i>VRN-B1</i> intron 1 with NIL | [4]       |
| Intr1/B/R3   | 5'-TCATGCCAAAAATTGAAGATGA-3'   | Triple Dirk B deletion          |           |

## References

1. Dorofeev VF, Filatenko AA, Migushova FF, Udachin RA, Jakubtsiner MM, Cultivated Flora of the USSR. Vol. 1. Pshenitsa (Wheat). Kolos, Leningrad, 1979 (In Russian).
2. Goncharov NP. Genus *Triticum* L. taxonomy: the present and the future. Plant Syst Evol. 2011;295(1):1-11.
3. Fu D, Szucs P, Yan L, Helguera M, Skinner JS, von Zitzewitz J, Hayes PM, Dubcovsky J. Large deletions within the first intron in *VRN-1* are associated with spring growth habit in barley and wheat. Mol Genet Genomics. 2005;273(1):54-65.
4. Yan L, Helguera M, Kato K, Fukuyama S, Sherman J, Dubcovsky J. Allelic variation at the *VRN-1* promoter region in polyploid wheat. Theor Appl Genet. 2004;109(8):1677-86.
